# Supplementary material
Source: ML conference proceedings conference paper supplement (https://openreview.net/forum?id=Y1edWJH9qB)
Supplement: supplementary_material [file attachment]

- 508 In this supplementary, we provide:
- 509  $\diamond$  Predictable hyperparameters introduction.
  - 510  $\diamond$  Training and implementation details.
  - 511  $\diamond$  Additional results of model parsing and CNN-generated image detection.
  - 512  $\diamond$  The construction of RED140 dataset.
  - 513  $\diamond$  Hyperparameter ground truth and the model parsing performance for each GM

## 514 A Predictable Hyperparameters Introduction

515 We investigate 37 hyperparameters that exhibit the predictability according to Asnani *et al.* [1].  
 516 These hyperparameters are categorized into three groups: (1) Loss Function (Tab. 4), (2) Discrete  
 517 Architecture Hyperparameters (Tab. 5), (3) Continuous Architecture Hyperparameters (Tab. 6). We  
 518 report our proposed method performance of parsing hyperparameters in these three groups via Fig. 7a,  
 519 Fig. 7b, and Fig. 7c, respectively. Moreover, in the main paper’s Eq. 8 and Fig. 4a, we employ the  
 520 assignment hierarchy  $M^s$  to group different hyperparameters together, which supervises the learning  
 521 of the matching matrix  $M$ . The construction of such the  $M^s$  is also based on Tab. 4, 5, and 6, which  
 522 not only define three coarse-level categories, but also fine-grained categories such as pixel-level  
 523 objective (loss) function (*e.g.*, L1 and MSE) in Tab. 4, and normalization methods (*e.g.*, ReLu and  
 524 Tanh) as well as nonlinearity functions (*e.g.*, Layer Norm. and Batch Norm.) in Tab. 5.

## 525 B Training and Implementation Details

526 **Training Details** Given the directed graph  $A \in \mathbb{R}^{C \times C}$ , which contains  $C$  graph nodes. We  
 527 empirically set  $C$  as 55, as mentioned in the main paper Sec. 3.3. In the training, LGPN takes the  
 528 given image  $I$  and output the refined feature  $V \in \mathbb{R}^{55 \times D}$ , which contains learned features for each  
 529 graph node, namely,  $V = \{v_0, v_1, \dots, v_{54}\}$ . As a matter of fact, we can view  $V$  as three separate  
 530 sections:  $V^l = \{v_0, v_1, \dots, v_9\}$ ,  $V^d = \{v_{10}, v_{11}, \dots, v_{27}\}$ , and  $V^c = \{v_{28}, v_{29}, \dots, v_{54}\}$ , which  
 531 denote learned features for graph nodes of 10 loss functions (*e.g.*, L1 and MSE), 18 discrete architecture  
 532 hyperparameter (*e.g.*, Batch Norm. and ReLU), and 9 continuous architecture hyperparameter (*i.e.*,  
 533 Parameter Num.), respectively. Note  $V^c$  represents learned features of 9 continuous architecture  
 534 hyperparameters because each continuous hyperparameter is represented by 3 graph nodes, as  
 535 illustrated in Fig. 1c of the main paper. Furthermore, via Eq. 7 in the main paper, we use  $V$  to obtain  
 536 the corresponding probability score  $p = \{p_0, p_1, \dots, p_{54}\}$  for each graph node. Similar to  $V$ , this  
 537  $p$  can be viewed as three sections:  $p^l \in \mathbb{R}^{10}$ ,  $p^d \in \mathbb{R}^{18}$  and  $p^c \in \mathbb{R}^{27}$  for loss functions, discrete  
 538 architecture hyperparameters, continuous architecture hyperparameters, respectively. In the end,  
 539 we use  $p$  to help optimize LGPN via the graph node classification loss (Eq. 7). After the training  
 540 converges, we further apply individual fully connected layers on the top of frozen learned features  
 541 of continuous architecture hyperparameters (*e.g.*,  $V^c$ ). via minimizing the  $\mathcal{L}_1$  distance between  
 542 predicted and ground truth value.

543 In the inference (the main paper Fig. 4b), for loss function and discrete architecture hyperparameters,  
 544 we use output probabilities (*e.g.*,  $p^l$  and  $p^d$ ) of discrete value graph nodes, for the binary “used v.s.  
 545 not” classification. For the continuous architecture hyperparameters, we first concatenate learned  
 546 features of corresponding graph nodes. We utilize such a concatenated feature with pre-trained, fully  
 547 connected layers to estimate the continuous hyperparameter value.

548 **Model Parsing Implementation Details** Denote the output feature from the Generation Trace  
 549 Capturing Network as  $f \in \mathbb{R}^{2048}$ . To transform  $f$  into a set of features  $H = \{h_0, h_1, \dots, h_{54}\}$  for the  
 550 55 graph nodes, 55 independent linear layers ( $\Theta$ ) are employed. Each feature  $h_i$  is of dimension  
 551  $\mathbb{R}^{128}$ . The  $H$  is fed to the GCN refinement block, which contains 5 GCN blocks, each of which has 2  
 552 stacked GCN layers. In other words, the GCN refinement block has 10 layers in total. We use the  
 553 correlation graph  $A \in \mathbb{R}^{55 \times 55}$  (Fig. 9) to capture the hyperparameter dependency and during the  
 554 training the LGPN pools  $A$  into  $A_1 \in \mathbb{R}^{18 \times 18}$  and  $A_2 \in \mathbb{R}^{6 \times 6}$  as the Fig. 2 of the main paper. The  
 555 LGPN is implemented using the PyTorch framework. During training, a learning rate of  $3e-2$  is used.  
 556 The training is performed with a batch size of 400, where 200 images are generated by various GMs  
 557 and 200 images are real.

Table 4: Loss Function types used by all GMs. We group the 10 loss functions into three categories. We use the binary representation to indicate the presence of each loss type in training the respective GM.

| Category       | Loss Function                    |
|----------------|----------------------------------|
| Pixel-level    | $L_1$                            |
|                | $L_2$                            |
|                | Mean squared error (MSE)         |
|                | Maximum mean discrepancy (MMD)   |
| Discriminator  | Least squares (LS)               |
|                | Wasserstein loss for GAN (WGAN)  |
|                | Kullback–Leibler (KL) divergence |
|                | Adversarial                      |
| Classification | Hinge                            |
|                | Cross-entropy (CE)               |

Table 5: Discrete Architecture Hyperparameters used by all GMs. We group the 18 discrete architecture hyperparameters into 6 categories. We use the binary representation to indicate the presence of each hyperparameter type in training the respective GM.

| Category                          | Discrete Architecture Hyperparameters |
|-----------------------------------|---------------------------------------|
| Normalization                     | Batch Normalization                   |
|                                   | Instance Normalization                |
|                                   | Adaptive Instance Normalization       |
|                                   | Group Normalization                   |
| Nonlinearity<br>in the Last Layer | ReLU                                  |
|                                   | Tanh                                  |
|                                   | Leaky_ReLU                            |
|                                   | Sigmoid                               |
|                                   | SiLU                                  |
| Nonlinearity<br>in the Last Block | ELU                                   |
|                                   | ReLU                                  |
|                                   | Leaky_ReLU                            |
|                                   | Sigmoid                               |
|                                   | SiLU                                  |
| Up-sampling                       | Nearest Neighbour Up-sampling         |
| Skip Connection                   | Deconvolution                         |
| Down-sampling                     | Feature used                          |

Table 6: Continuous Architecture Hyperparameters used by all GMs, where "[" denotes inclusive and ")" denotes exclusive intervals. We report the range for 9 continuous hyperparameters.

| Category     | Range            | Discrete Architecture Hyperparameters |
|--------------|------------------|---------------------------------------|
| Layer Number | (0—717]          | Layers Number                         |
|              | [0—289]          | Convolution Layer Number              |
|              | [0—185]          | Fully-connected Layer Number          |
|              | [0—46]           | Pooling Layer Number                  |
|              | [0—235]          | Normalization Layer Number            |
|              | (0—20]           | Layer Number per Block                |
| Unit Number  | (0—8, 365]       | Filter Number                         |
|              | (0—155]          | Block Number                          |
|              | (0—56, 008, 488] | Parameter Number                      |

558 **Implementation Details for Detection and Attributions** We validate GTC’s effectiveness in  
559 capturing the generation trace in Fig. 6. Specifically, Fig. 8 shows the detailed implementation. We  
560 employ FC layers to convert output feature  $\mathbf{f} \in \mathbb{R}^{2048}$  to  $\mathbf{f}_{det.} \in \mathbb{R}^2$  and  $\mathbf{f}_{att.} \in \mathbb{R}^5$  for CNN-generated  
561 image detection and image attribution respectively.

## 562 C Additional Results

563 We report the detailed performance on RED116 via Tab. 9, demonstrating that our proposed LGPN  
564 achieves the best performance on both datasets. Also, In Fig. 5a of the main paper, we visualize the

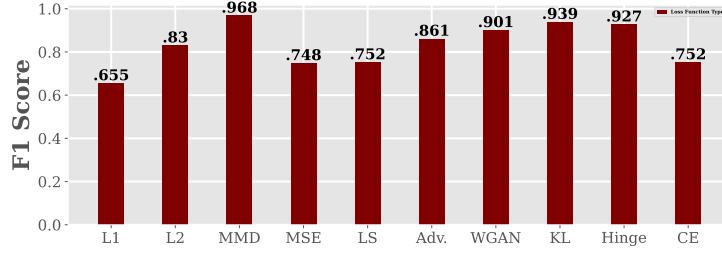

(a)

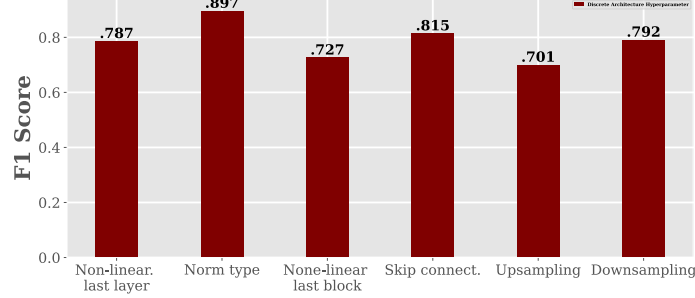

(b)

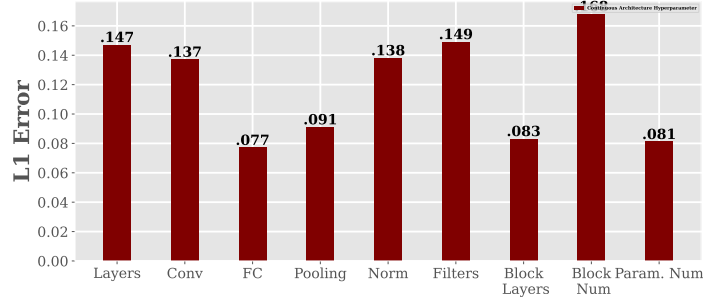

(c)

Figure 7: (a) The F1score on the loss function reveals that MMD and KL are two easiest loss functions to predict. (b) The F1 score on the discrete architecture hyperparameters demonstrates that predicting these hyperparameters is more challenging than predicting the loss function. This finding aligns with the empirical results reported in the previous work [1]. (c) The L1 error on the continuous architecture hyperparameters indicates that it is challenging to predict Block Num. and Filter Num..

Table 7: Using different  $n$  graph nodes for the continuous hyperparameter regression.

| $n$ Value | 2     | 3     | 4     | 5     | 6     |
|-----------|-------|-------|-------|-------|-------|
| L1 Error  | 0.123 | 0.120 | 0.124 | 0.132 | 0.130 |

correlation graph similarities among different GMs in the first test set. In this section, we offer a similar visualization (e.g., Fig. 10 of the supplementary) for other test sets. Supplementary Fig. 11 shows the relationship between graph node classification and GM correlation graph similarity for GMs. In the main paper’s Sec 3.3, we use  $n$  graph nodes for each continuous hyperparameter, and  $n$  is set as 3. Tab. 7 shows the advantage of choice, which shows the lowest  $\mathcal{L}_1$  regression error is achieved when  $n$  is 3. Furthermore, in addition to Fig. 6 a of the main paper, we provide the detailed CNN-generated image detection performance measured by in Supplementary’s Tab. 8.

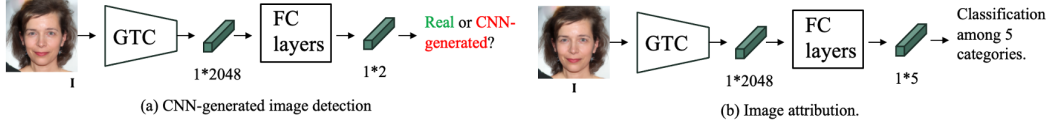

Figure 8: We construct simple classifiers based on GTC. Then, we train these two classifiers for CNN-generated image detection and image attribution, respectively. Please note that GTC only leverages ImageNet pre-trained weights as the initialization, same as the previous method [54]. For a fair comparison, no model parsing datasets such as RED116 and RED140 are used for pre-training.

| Detection method        | Generative Adversarial Networks |              |              |              |              |              | Deep-fakes   | Low level vision | Perceptual loss |              |              | Avg.         |
|-------------------------|---------------------------------|--------------|--------------|--------------|--------------|--------------|--------------|------------------|-----------------|--------------|--------------|--------------|
|                         | Pro-GAN                         | Cycle-GAN    | Big-GAN      | Style-GAN    | Gau-GAN      | Star-GAN     |              |                  | SAN             | CRN          | IMLE         |              |
| Wang. <i>et al</i> [54] | <b>100.0</b>                    | 96.83        | 88.24        | 98.29        | 98.09        | 95.44        | 66.27        | 86.0             | 61.2            | 98.94        | 99.52        | 89.89        |
| DE-FAKE [46]            | 96.03                           | 97.74        | 89.93        | 78.09        | 98.15        | 98.34        | 81.43        | 88.71            | <b>90.14</b>    | 90.01        | 95.14        | 91.52        |
| HiFi-Net [20]           | 96.00                           | 89.50        | 96.31        | 90.05        | 88.00        | 96.40        | 84.71        | 79.90            | 81.00           | 90.00        | 62.00        | 87.51        |
| Ojha. <i>et al</i> [41] | <b>100.0</b>                    | 99.46        | <b>99.59</b> | 97.24        | <b>99.98</b> | 99.60        | 82.45        | 61.32            | 79.02           | 96.72        | 99.00        | 92.21        |
| NPR. [49]               | <b>100.0</b>                    | <b>99.50</b> | 94.50        | 99.80        | 88.80        | <b>100.0</b> | 86.20        | 75.32            | 82.72           | 94.72        | 98.11        | 93.30        |
| Ours                    | <b>100.0</b>                    | 97.03        | 97.76        | <b>99.96</b> | 98.97        | 99.65        | <b>93.50</b> | <b>98.42</b>     | 85.00           | <b>99.60</b> | <b>99.90</b> | <b>97.27</b> |

Table 8: To show the effectiveness of the GTC, we report CNN-generated image detection performance measured by Average Precision on 11 forgery methods containing face and non-face images. Previous methods’ quantitative results are taken from [41]. [**Bold**: best result].

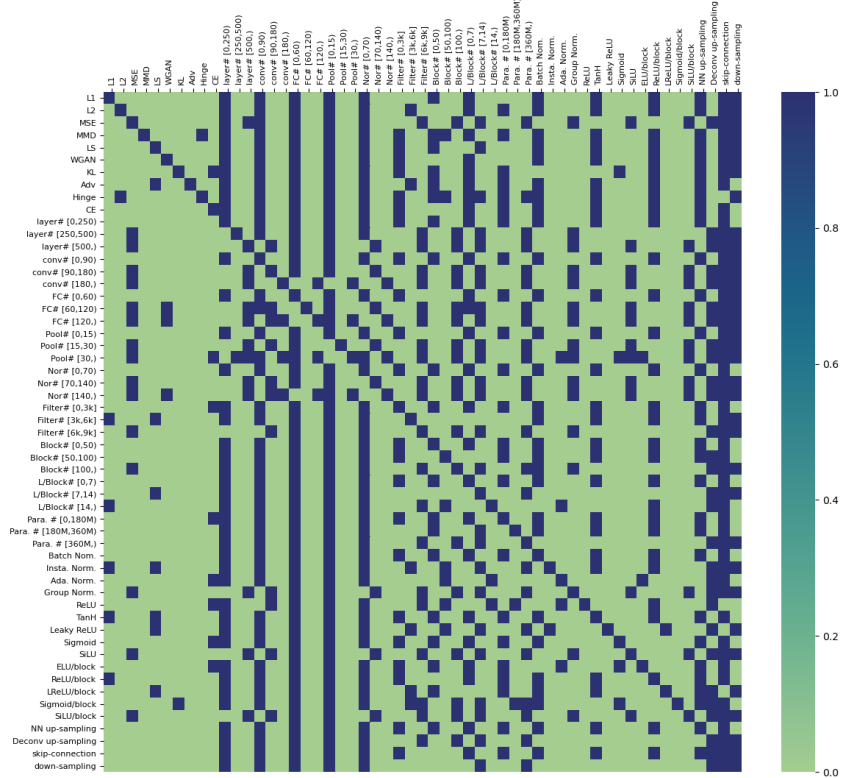

Figure 9: The initial correlation graph **A** that we construct based on the probability table in Sec. 3.1 of the main paper. The optimum threshold we use is 0.45.

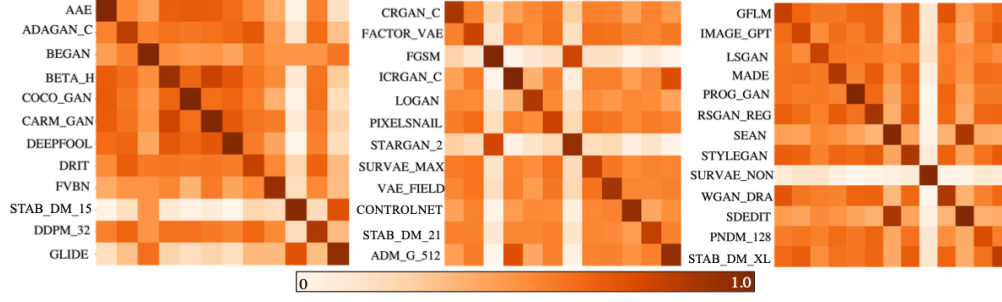

Figure 10: Each element of these two matrices is the average cosine similarities of 2,000 pairs of generated correlation graphs  $A'_0$  from corresponding GMs in the second, third and fourth test sets.

| Method             | Loss Function |                 | Dis. Archi. Para. |                 | Con. Archi. Para.     |
|--------------------|---------------|-----------------|-------------------|-----------------|-----------------------|
|                    | F1 $\uparrow$ | Acc. $\uparrow$ | F1 $\uparrow$     | Acc. $\uparrow$ | L1 error $\downarrow$ |
| Random GT [1]      | 0.636         | 0.716           | 0.529             | 0.575           | 0.184                 |
| FEN-PN [1]         | 0.813         | 0.792           | 0.718             | 0.706           | 0.149                 |
| FEN-PN* [1]        | 0.801         | 0.811           | 0.701             | 0.708           | 0.146                 |
| GTC w MLP          | 0.778         | 0.801           | 0.689             | 0.701           | 0.169                 |
| GTC w Stacked -GCN | 0.790         | 0.831           | 0.698             | 0.720           | 0.145                 |
| LGPN               | <b>0.841</b>  | <b>0.833</b>    | <b>0.727</b>      | <b>0.755</b>    | <b>0.130</b>          |

Table 9: The model parsing performance on RED116. In the last row, our proposed LGPN that contains GTC and GCN Refinement block, which achieves the best model parsing performance in all metrics. [**Key**: GCN refine.: GCN refinement block; **Bold**: best.].

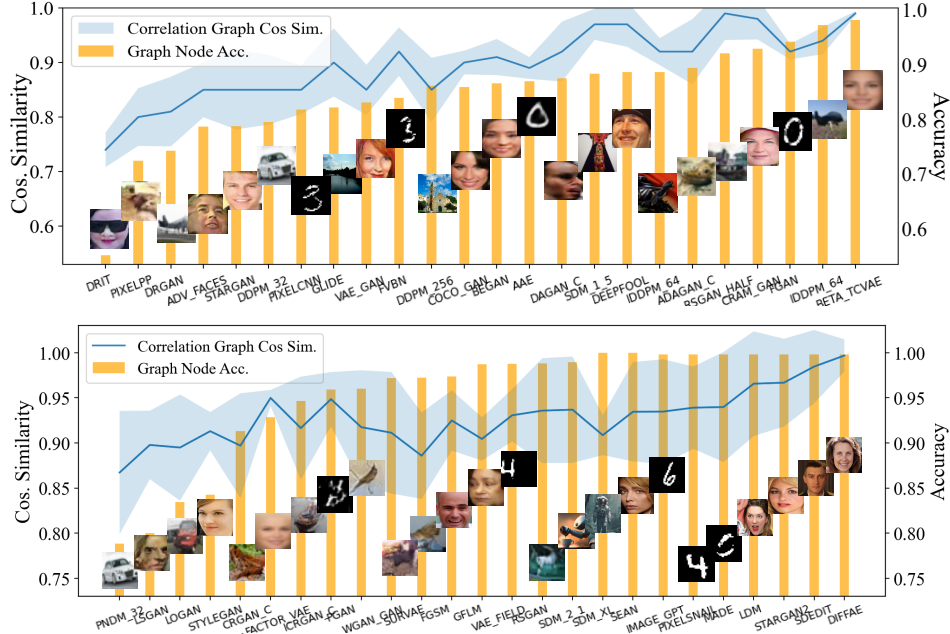

Figure 11: For each GM in four test sets. The upper figure corresponds to the first and second test sets, while the lower figure corresponds to the third and fourth test sets. The positive correlation between the cosine similarity between image pairs' correlation graphs (*i.e.*,  $A'_0$ ) and the graph node classification accuracy achieved by LGPN on that particular GM. This positive correlation demonstrates that the correlation graph is important to the performance of the graph node classification, which encourages the LGPN to learn the representation for each hyperparameter.

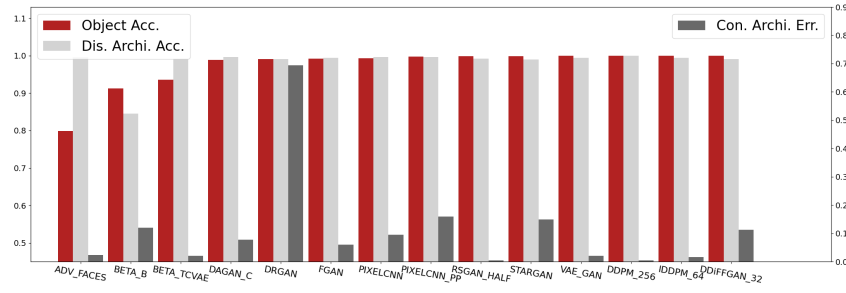

(a)

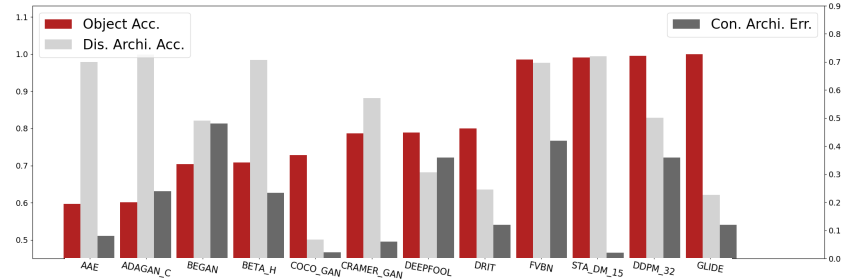

(b)

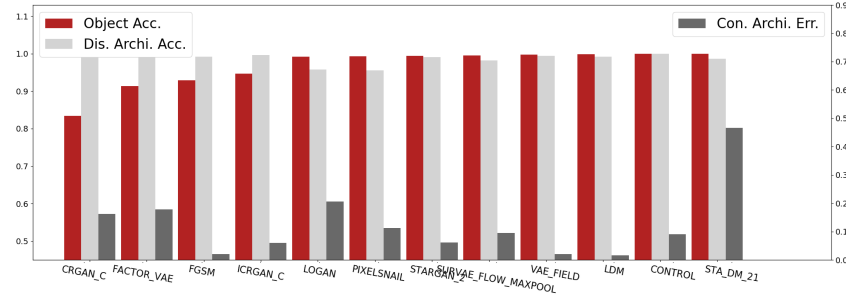

(c)

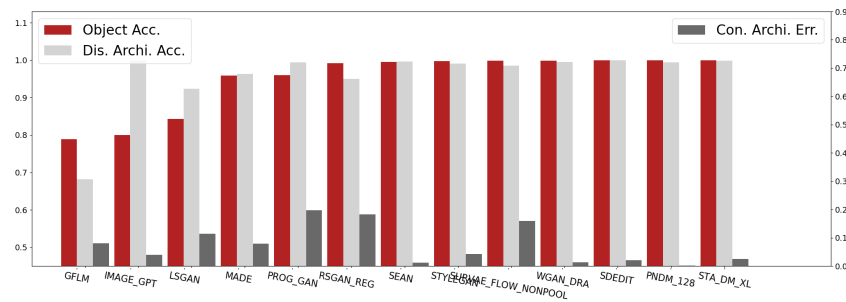

(d)

Figure 12: We report detailed model parsing results on different GMs in each test set. These results include loss function and discrete architecture hyperparameter prediction accuracy, as well as the L1 error on the continuous architecture hyperparameter prediction. Specifically, (a), (b), (c), and (d) are the performance for GMs in the 1st, 2nd, 3rd, and 4th test sets, respectively.

Table 10: Test sets used for evaluation. Each set contains generative models from GAN, DM, VAE, AR (Auto-Regressive), AA (Adversarial Attack), and NF (Normalizing Flow). All test sets contain face and non-face in the image content. [Keys: R means GM is used in the test set of RED116 but is not used in RED140.]

| Set 1          | Set 2          | Set 3               | Set 4               |
|----------------|----------------|---------------------|---------------------|
| ADV_FACES      | AAE            | BICYCLE_GAN (R)     | GFLM                |
| BETA_B         | ADAGAN_C       | BIGGAN_512 (R)      | IMAGE_GPT           |
| BETA_TCVAE     | BEGAN          | CRGAN_C             | LSGAN               |
| BIGGAN_128 (R) | BETA_H         | FACTOR_VAE          | MADE                |
| DAGAN_C        | BIGGAN_256 (R) | FGSM                | PIX2PIX (R)         |
| DRGAN          | COCOGAN        | ICRGAN_C            | PROG_GAN            |
| FGAN           | CRAMERGAN      | LOGAN               | RSGAN_REG           |
| PIXEL_CNN      | DEEFOOL        | MUNIT (R)           | SEAN                |
| PIXEL_CNN++    | DRIT           | PIXEL_SNAIL         | STYLE_GAN           |
| RSGAN_HALF     | FAST_PIXEL(R)  | STARGAN_2           | SURVAE_FLOW_NONPOOL |
| STARGAN        | FVBN           | SURVAE_FLOW_MAXPOOL | WGAN_DRA            |
| VAEGAN         | SRFLOW (R)     | VAE_FIELD           | YLG (R)             |
| DDPM_256       | STABLE_DM_21   | LDM                 | PNDM_32             |
| IDDPM_64       | DDPM_32        | CONTROLNET          | STABLE_DM_XL        |
| Denoise_GAN_32 | GLIDE          | STABLE_DM_15        | SEDdit              |

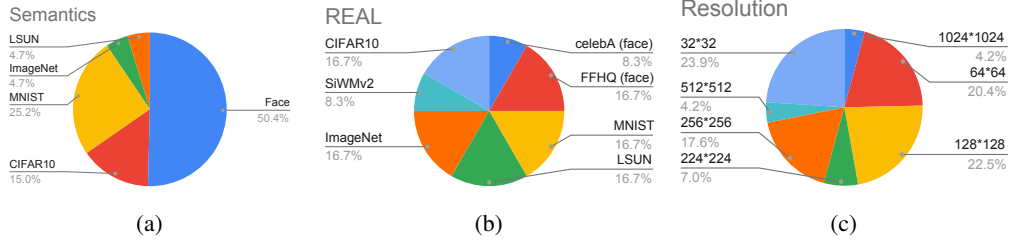

Figure 13: RED140 statistics. (a) The dataset is trained on various image contents or semantics. (b) The real-image category contains many real-image datasets that GMs are trained on [29, 28, 13, 60, 21, 32, 33]. (c) The GM has various image resolutions.

## D RED140 Dataset

In this section, we provide an overview of the RED140 dataset, which is used for both model parsing and coordinated attack detection. Note that, for the experiment reported in Tab. ?? of the supplementary, we follow the test sets defined in RED116 [1]. When we construct RED140, we use images from ImageNet, FFHQ, CelebHQ, CIFAR10, and LSUN as the real-images category of RED140. We exclude GM that is not trained in the real-image category of RED140. In addition, both RED116 and RED140 contain various image content and resolution, and the details about RED140 are uncovered in Fig. 13 of the supplementary. For test sets (Tab. 10 of the supplementary), we follow the dataset partition of RED116, excluding the GMs that are trained on real images, which RED140 does have. For example, JFT-300M is used to train BigGAN, so we remove BIGGAN\_128, BIGGAN\_256 and BIGGAN\_512 in the first, second, and third test sets.

## E GM Hyperparameter Ground Truth

In this section, we report the ground truth vector of different hyperparameters of each GM contained in the RED140. Specifically, Tab. 11 and Tab. 12 report the loss function ground truth vector for each GM. Tab. 13 and Tab. 14 report the discrete architecture hyperparameter ground truth for each GM. Tab. 15 and Tab. 16 report the continuous architecture hyperparameter ground truth for each GM. The detailed model parsing performance on each GM is reported in the supplementary’s Fig. 12.

Table 11: Ground truth Loss Function feature vector used for prediction of loss type for all GMs. The loss function ground truth is in (Tab. 4).

| GM              | $L_1$ | $L_2$ | MSE | MMD | LS | WGAN | KL | Adversarial | Hinge | CE |
|-----------------|-------|-------|-----|-----|----|------|----|-------------|-------|----|
| AAE             | 1     | 0     | 0   | 0   | 0  | 0    | 0  | 0           | 0     | 1  |
| ACGAN           | 1     | 0     | 0   | 0   | 0  | 0    | 0  | 0           | 0     | 1  |
| ADAGAN_C        | 0     | 0     | 0   | 0   | 1  | 0    | 0  | 0           | 0     | 1  |
| ADAGAN_P        | 0     | 0     | 0   | 0   | 1  | 0    | 0  | 0           | 0     | 0  |
| ADM_G_128       | 0     | 0     | 1   | 0   | 0  | 0    | 0  | 0           | 0     | 0  |
| ADM_G_256       | 0     | 0     | 1   | 0   | 0  | 0    | 0  | 0           | 0     | 0  |
| ADV_FACES       | 1     | 0     | 1   | 0   | 1  | 0    | 0  | 0           | 0     | 0  |
| ALAE            | 0     | 0     | 1   | 0   | 1  | 0    | 0  | 0           | 0     | 0  |
| BEGAN           | 1     | 0     | 0   | 0   | 0  | 0    | 0  | 0           | 0     | 0  |
| BETA_B          | 0     | 0     | 0   | 0   | 0  | 0    | 1  | 0           | 0     | 1  |
| BETA_H          | 0     | 0     | 0   | 0   | 0  | 0    | 1  | 0           | 0     | 1  |
| BETA_TCVAE      | 1     | 0     | 0   | 0   | 0  | 0    | 1  | 0           | 0     | 1  |
| BGAN            | 0     | 0     | 0   | 0   | 1  | 0    | 0  | 0           | 0     | 1  |
| BICYCLE_GAN     | 1     | 0     | 1   | 0   | 0  | 0    | 1  | 0           | 0     | 0  |
| BIGGAN_128      | 1     | 0     | 0   | 0   | 0  | 0    | 0  | 0           | 0     | 0  |
| BIGGAN_256      | 1     | 0     | 0   | 0   | 0  | 0    | 0  | 0           | 0     | 0  |
| BIGGAN_512      | 1     | 0     | 0   | 0   | 0  | 0    | 0  | 0           | 0     | 0  |
| Blended_DM      | 0     | 0     | 1   | 0   | 0  | 0    | 0  | 0           | 0     | 0  |
| CADGAN          | 0     | 0     | 0   | 1   | 0  | 0    | 0  | 0           | 0     | 0  |
| CCGAN           | 0     | 0     | 0   | 0   | 1  | 0    | 0  | 1           | 0     | 0  |
| CGAN            | 0     | 0     | 1   | 0   | 1  | 0    | 0  | 0           | 0     | 0  |
| CLIPDM          | 0     | 0     | 1   | 0   | 0  | 0    | 0  | 0           | 0     | 0  |
| COCO_GAN        | 1     | 1     | 0   | 0   | 0  | 1    | 0  | 0           | 1     | 0  |
| COGAN           | 0     | 0     | 0   | 0   | 1  | 0    | 0  | 0           | 0     | 0  |
| COLOUR_GAN      | 1     | 0     | 0   | 0   | 1  | 0    | 0  | 0           | 0     | 0  |
| CONT_ENC        | 0     | 1     | 0   | 0   | 1  | 0    | 0  | 0           | 0     | 0  |
| CONTRAGAN       | 1     | 0     | 0   | 0   | 0  | 0    | 0  | 1           | 0     | 1  |
| CONTROLNET      | 0     | 0     | 1   | 0   | 0  | 0    | 0  | 0           | 0     | 0  |
| COUNCIL_GAN     | 1     | 0     | 1   | 0   | 1  | 0    | 0  | 0           | 0     | 0  |
| CRAMER_GAN      | 0     | 0     | 0   | 0   | 0  | 1    | 0  | 0           | 0     | 0  |
| CRGAN_C         | 1     | 1     | 0   | 0   | 0  | 0    | 0  | 0           | 0     | 1  |
| CRGAN_P         | 1     | 1     | 0   | 0   | 0  | 0    | 0  | 0           | 0     | 0  |
| CYCLEGAN        | 1     | 0     | 0   | 0   | 1  | 0    | 0  | 0           | 0     | 0  |
| DAGAN_C         | 1     | 0     | 0   | 0   | 0  | 0    | 0  | 0           | 0     | 1  |
| DAGAN_P         | 1     | 0     | 0   | 0   | 0  | 0    | 0  | 0           | 0     | 0  |
| DCGAN           | 0     | 0     | 0   | 0   | 0  | 0    | 0  | 0           | 0     | 1  |
| DDPM_32         | 0     | 0     | 1   | 0   | 0  | 0    | 0  | 0           | 0     | 0  |
| DDPM_256        | 0     | 0     | 1   | 0   | 0  | 0    | 0  | 0           | 0     | 0  |
| DDIFFGAN_32     | 0     | 0     | 1   | 0   | 0  | 1    | 0  | 0           | 0     | 0  |
| DEEFOOL         | 1     | 1     | 0   | 0   | 0  | 0    | 0  | 0           | 0     | 0  |
| DFCVAE          | 0     | 1     | 0   | 0   | 0  | 0    | 1  | 0           | 0     | 1  |
| DIFFAE_256      | 0     | 0     | 1   | 0   | 0  | 0    | 0  | 0           | 0     | 0  |
| DIFFAE_LATENT   | 0     | 0     | 1   | 0   | 0  | 0    | 0  | 0           | 0     | 0  |
| DIFF-ProGAN     | 0     | 0     | 0   | 0   | 0  | 0    | 1  | 0           | 0     | 0  |
| DIFF-StyleGAN   | 0     | 0     | 0   | 0   | 0  | 0    | 1  | 0           | 0     | 0  |
| DIFF-ISGEN      | 0     | 0     | 0   | 0   | 0  | 0    | 1  | 0           | 0     | 0  |
| DISCOGAN        | 1     | 0     | 0   | 0   | 1  | 0    | 0  | 0           | 0     | 0  |
| DRGAN           | 0     | 0     | 0   | 0   | 1  | 0    | 0  | 0           | 0     | 1  |
| DRIT            | 1     | 0     | 0   | 0   | 1  | 0    | 0  | 0           | 0     | 1  |
| DUALGAN         | 1     | 0     | 0   | 0   | 0  | 1    | 0  | 0           | 0     | 0  |
| EBGAN           | 0     | 1     | 0   | 0   | 1  | 0    | 0  | 1           | 1     | 0  |
| ESRGAN          | 1     | 0     | 0   | 0   | 1  | 0    | 0  | 0           | 0     | 0  |
| FACTOR_VAE      | 1     | 0     | 0   | 0   | 0  | 0    | 1  | 0           | 0     | 1  |
| Fast pixel      | 0     | 0     | 0   | 0   | 0  | 0    | 0  | 0           | 0     | 1  |
| FFGAN           | 1     | 1     | 0   | 0   | 1  | 0    | 0  | 0           | 0     | 1  |
| FGAN            | 0     | 0     | 0   | 0   | 1  | 0    | 0  | 1           | 0     | 0  |
| FGAN_KL         | 1     | 0     | 0   | 0   | 0  | 0    | 0  | 0           | 0     | 0  |
| FGAN_NEYMAN     | 0     | 1     | 0   | 0   | 0  | 0    | 0  | 0           | 0     | 0  |
| FGAN_PEARSON    | 0     | 0     | 1   | 0   | 0  | 0    | 0  | 0           | 1     | 0  |
| FGSM            | 0     | 0     | 0   | 0   | 1  | 0    | 0  | 0           | 0     | 0  |
| FPGAN           | 1     | 1     | 0   | 0   | 1  | 0    | 0  | 0           | 0     | 1  |
| FSGAN           | 1     | 0     | 0   | 0   | 1  | 0    | 0  | 0           | 0     | 1  |
| FVBN            | 0     | 0     | 0   | 0   | 0  | 0    | 0  | 0           | 0     | 1  |
| GAN_ANIME       | 1     | 1     | 0   | 0   | 0  | 1    | 0  | 0           | 1     | 0  |
| Gated_pixel_cnn | 0     | 0     | 0   | 0   | 0  | 0    | 0  | 0           | 0     | 1  |
| GDWCT           | 1     | 0     | 1   | 0   | 0  | 0    | 0  | 0           | 1     | 0  |
| GFLM            | 0     | 0     | 1   | 0   | 0  | 0    | 0  | 0           | 0     | 1  |
| GGAN            | 1     | 0     | 0   | 0   | 0  | 0    | 0  | 0           | 0     | 0  |
| GLIDE           | 0     | 0     | 1   | 0   | 0  | 0    | 0  | 0           | 0     | 0  |
| ICRGAN_C        | 1     | 1     | 0   | 0   | 0  | 0    | 0  | 0           | 0     | 1  |
| ICRGAN_P        | 1     | 1     | 0   | 0   | 0  | 0    | 0  | 0           | 0     | 0  |



Table 12: Ground truth Loss Function feature vector used for prediction of loss type for all GMs. The loss function ground truth is in (Tab. 4).

| GM                  | $L_1$ | $L_2$ | MSE | MMD | LS | WGAN | KL | Adversarial | Hinge | CE |
|---------------------|-------|-------|-----|-----|----|------|----|-------------|-------|----|
| IDDPM_32            | 0     | 0     | 1   | 0   | 0  | 0    | 0  | 0           | 0     | 0  |
| IDDPM_64            | 0     | 0     | 1   | 0   | 0  | 0    | 0  | 0           | 0     | 0  |
| IDDPM_256           | 0     | 0     | 1   | 0   | 0  | 0    | 0  | 0           | 0     | 0  |
| ILVER_256           | 0     | 0     | 1   | 0   | 0  | 0    | 0  | 0           | 0     | 0  |
| Image_GPT           | 0     | 0     | 0   | 0   | 0  | 0    | 0  | 0           | 0     | 1  |
| INFOGAN             | 0     | 0     | 1   | 0   | 1  | 0    | 0  | 0           | 0     | 1  |
| LAPGAN              | 0     | 0     | 0   | 0   | 1  | 0    | 0  | 0           | 0     | 0  |
| LDM                 | 0     | 0     | 1   | 0   | 0  | 0    | 0  | 0           | 0     | 0  |
| LDM_CON             | 0     | 0     | 1   | 0   | 0  | 1    | 0  | 0           | 0     | 0  |
| Lmconv              | 0     | 0     | 0   | 0   | 0  | 0    | 0  | 0           | 0     | 1  |
| LOGAN               | 1     | 1     | 0   | 0   | 0  | 0    | 0  | 1           | 0     | 0  |
| LSGAN               | 0     | 0     | 1   | 0   | 0  | 0    | 0  | 0           | 1     | 0  |
| MADE                | 0     | 0     | 0   | 0   | 0  | 0    | 0  | 0           | 0     | 1  |
| MAGAN               | 0     | 0     | 1   | 0   | 0  | 0    | 0  | 0           | 0     | 0  |
| MEMGAN              | 0     | 0     | 0   | 0   | 1  | 0    | 0  | 0           | 0     | 0  |
| MMD_GAN             | 1     | 0     | 0   | 1   | 0  | 0    | 0  | 0           | 0     | 0  |
| MRGBAN              | 0     | 0     | 1   | 0   | 1  | 0    | 0  | 0           | 0     | 0  |
| MSG_STYLE_GAN       | 0     | 0     | 0   | 0   | 1  | 0    | 0  | 0           | 0     | 0  |
| MUNIT               | 1     | 0     | 0   | 0   | 1  | 0    | 0  | 0           | 0     | 0  |
| NADE                | 0     | 0     | 0   | 0   | 0  | 0    | 0  | 0           | 0     | 1  |
| OCFGAN              | 0     | 0     | 0   | 1   | 0  | 0    | 0  | 0           | 1     | 0  |
| PGD                 | 1     | 1     | 0   | 0   | 0  | 0    | 0  | 0           | 0     | 0  |
| PIX2PIX             | 1     | 0     | 0   | 0   | 1  | 0    | 0  | 0           | 0     | 0  |
| PixelCNN            | 0     | 0     | 0   | 0   | 0  | 0    | 0  | 0           | 0     | 1  |
| PixelCNN++          | 0     | 0     | 0   | 0   | 0  | 0    | 0  | 0           | 0     | 1  |
| PIXELDA             | 0     | 0     | 0   | 0   | 1  | 0    | 0  | 0           | 1     | 1  |
| PixelSnail          | 0     | 0     | 0   | 0   | 0  | 0    | 0  | 0           | 0     | 1  |
| PNDM_32             | 0     | 0     | 1   | 0   | 0  | 0    | 0  | 0           | 0     | 0  |
| PNDM_256            | 0     | 0     | 1   | 0   | 0  | 0    | 0  | 0           | 0     | 0  |
| PROG_GAN            | 0     | 0     | 0   | 0   | 0  | 1    | 0  | 0           | 1     | 0  |
| RGAN                | 0     | 0     | 0   | 0   | 0  | 1    | 0  | 0           | 0     | 0  |
| RSGAN_HALF          | 0     | 0     | 0   | 0   | 0  | 0    | 0  | 0           | 0     | 1  |
| RSGAN_QUAR          | 0     | 0     | 0   | 0   | 0  | 0    | 0  | 0           | 0     | 1  |
| RSGAN_REG           | 0     | 0     | 0   | 0   | 0  | 0    | 0  | 0           | 0     | 1  |
| RSGAN_RES_BOT       | 0     | 0     | 0   | 0   | 0  | 0    | 0  | 0           | 0     | 1  |
| RSGAN_RES_HALF      | 0     | 0     | 0   | 0   | 0  | 0    | 0  | 0           | 0     | 1  |
| RSGAN_RES_QUAR      | 0     | 0     | 0   | 0   | 0  | 0    | 0  | 0           | 0     | 1  |
| RSGAN_RES_REG       | 0     | 0     | 0   | 0   | 0  | 0    | 0  | 0           | 0     | 1  |
| SAGAN               | 0     | 0     | 0   | 0   | 1  | 0    | 0  | 0           | 0     | 0  |
| SCOREDIFF_256       | 0     | 0     | 1   | 0   | 0  | 0    | 0  | 0           | 0     | 0  |
| SDEdit_256          | 0     | 0     | 1   | 0   | 0  | 0    | 0  | 0           | 0     | 0  |
| SEAN                | 1     | 0     | 0   | 0   | 1  | 0    | 0  | 0           | 0     | 0  |
| SEMANTIC            | 0     | 1     | 0   | 0   | 1  | 0    | 0  | 0           | 0     | 0  |
| SGAN                | 0     | 0     | 0   | 0   | 1  | 0    | 0  | 0           | 0     | 1  |
| SNGAN               | 0     | 0     | 0   | 0   | 1  | 0    | 0  | 1           | 0     | 0  |
| SOFT_GAN            | 0     | 0     | 0   | 0   | 1  | 0    | 0  | 0           | 0     | 0  |
| SRFLOW              | 1     | 0     | 0   | 0   | 0  | 0    | 0  | 0           | 0     | 1  |
| SRRNET              | 0     | 1     | 1   | 0   | 1  | 0    | 0  | 0           | 0     | 1  |
| STANDARD_VAE        | 0     | 0     | 0   | 0   | 0  | 0    | 1  | 0           | 0     | 1  |
| STARGAN             | 1     | 0     | 0   | 0   | 1  | 0    | 0  | 0           | 0     | 1  |
| STARGAN_2           | 1     | 0     | 0   | 0   | 1  | 0    | 0  | 0           | 0     | 0  |
| STA_DM_15           | 0     | 0     | 1   | 0   | 0  | 0    | 0  | 0           | 0     | 0  |
| STA_DM_21           | 0     | 0     | 1   | 0   | 0  | 0    | 0  | 0           | 0     | 0  |
| STA_DM_XL           | 0     | 0     | 1   | 0   | 0  | 0    | 0  | 0           | 0     | 0  |
| STGAN               | 1     | 0     | 0   | 0   | 1  | 1    | 0  | 0           | 0     | 0  |
| STYLEGAN            | 0     | 1     | 0   | 0   | 0  | 1    | 0  | 0           | 0     | 0  |
| STYLEGAN_2          | 0     | 1     | 0   | 0   | 1  | 0    | 0  | 0           | 1     | 0  |
| STYLEGAN2_ADA       | 0     | 1     | 0   | 1   | 1  | 0    | 0  | 0           | 1     | 0  |
| SURVAE_FLOW_MAXPOOL | 0     | 0     | 0   | 0   | 0  | 0    | 1  | 0           | 0     | 1  |
| SURVAE_FLOW_NONPOOL | 0     | 0     | 0   | 0   | 0  | 0    | 1  | 0           | 0     | 1  |
| TPGAN               | 1     | 0     | 0   | 0   | 0  | 1    | 0  | 0           | 0     | 0  |
| UGAN                | 0     | 0     | 0   | 0   | 1  | 0    | 0  | 0           | 0     | 0  |
| UNIT                | 0     | 0     | 0   | 0   | 1  | 0    | 1  | 0           | 0     | 0  |
| VAE_field           | 0     | 0     | 0   | 0   | 0  | 0    | 1  | 0           | 0     | 1  |
| VAE_flow            | 0     | 0     | 0   | 0   | 0  | 0    | 1  | 0           | 0     | 1  |
| VAEGAN              | 1     | 0     | 0   | 0   | 1  | 0    | 1  | 0           | 0     | 0  |
| VDVAE               | 0     | 0     | 0   | 0   | 0  | 0    | 1  | 0           | 0     | 1  |
| WGAN                | 0     | 0     | 0   | 0   | 0  | 1    | 0  | 0           | 0     | 0  |
| WGAN_DRA            | 0     | 0     | 1   | 0   | 0  | 1    | 0  | 0           | 0     | 0  |
| WGAN_WC             | 0     | 0     | 0   | 0   | 0  | 1    | 0  | 0           | 0     | 0  |
| WGANGP              | 0     | 1     | 0   | 0   | 0  | 1    | 0  | 0           | 0     | 0  |
| YLG                 | 0     | 0     | 0   | 0   | 0  | 1    | 0  | 0           | 0     | 0  |

Table 13: Ground truth feature vector used for prediction of Discrete Architecture Hyperparameters for all GMs. The discrete architecture hyperparameter ground truth is defined in (Tab. 5). **A — D** are Batch Norm., Instance Norm., Adaptive Instance Norm., and Group Norm., respectively. **E — I** are non-linearity in the last layer, and they are ReLU, Tanh, Leaky\_ReLu, Sigmoid, and SiLU. **J — N** are non-linearity in the last block, and they are ELU, ReLU, Leaky\_ReLu, Sigmoid, and SiLU. **O** and **P** are Nearest Neighbour and Deconvolution Upsampling. **Q** and **L** are Skip Connection and Downsampling.

| GM              | A | B | C | D | E | F | G | H | I | J | K | L | M | N | O | P | Q | L |
|-----------------|---|---|---|---|---|---|---|---|---|---|---|---|---|---|---|---|---|---|
| AAE             | 1 | 0 | 0 | 0 | 0 | 1 | 0 | 0 | 0 | 1 | 0 | 0 | 0 | 0 | 1 | 0 | 1 | 0 |
| ACGAN           | 1 | 0 | 0 | 0 | 0 | 1 | 0 | 0 | 0 | 0 | 1 | 0 | 0 | 0 | 1 | 0 | 1 | 0 |
| ADAGAN_C        | 1 | 0 | 0 | 0 | 0 | 1 | 0 | 0 | 0 | 0 | 1 | 0 | 0 | 0 | 1 | 0 | 1 | 0 |
| ADAGAN_P        | 1 | 0 | 0 | 0 | 0 | 1 | 0 | 0 | 0 | 0 | 1 | 0 | 0 | 0 | 1 | 0 | 1 | 0 |
| ADM_G_128       | 0 | 0 | 0 | 1 | 0 | 0 | 0 | 0 | 1 | 0 | 0 | 0 | 0 | 1 | 0 | 1 | 1 | 1 |
| ADM_G_256       | 0 | 0 | 0 | 1 | 0 | 0 | 0 | 0 | 1 | 0 | 0 | 0 | 0 | 1 | 0 | 1 | 1 | 1 |
| ADV_FACES       | 0 | 1 | 0 | 0 | 0 | 1 | 0 | 0 | 0 | 0 | 1 | 0 | 0 | 0 | 1 | 0 | 1 | 0 |
| ALAE            | 0 | 1 | 0 | 0 | 0 | 0 | 1 | 0 | 0 | 0 | 0 | 1 | 0 | 0 | 0 | 1 | 0 | 1 |
| BEGAN           | 1 | 0 | 0 | 0 | 0 | 1 | 0 | 0 | 0 | 1 | 0 | 0 | 0 | 0 | 1 | 0 | 0 | 0 |
| BETA_B          | 0 | 0 | 0 | 0 | 0 | 0 | 0 | 1 | 0 | 0 | 1 | 0 | 0 | 0 | 1 | 0 | 1 | 1 |
| BETA_H          | 0 | 0 | 0 | 0 | 0 | 0 | 0 | 1 | 0 | 0 | 1 | 0 | 0 | 0 | 1 | 0 | 1 | 1 |
| BETA_TCVAE      | 0 | 0 | 0 | 0 | 0 | 0 | 0 | 1 | 0 | 0 | 1 | 0 | 0 | 0 | 1 | 0 | 1 | 1 |
| BGAN            | 1 | 0 | 0 | 0 | 0 | 1 | 0 | 0 | 0 | 0 | 0 | 1 | 0 | 0 | 1 | 0 | 0 | 0 |
| BICYCLE_GAN     | 1 | 0 | 0 | 0 | 0 | 1 | 0 | 0 | 0 | 0 | 1 | 0 | 0 | 0 | 1 | 0 | 0 | 0 |
| BIGGAN_128      | 1 | 0 | 0 | 0 | 0 | 1 | 0 | 0 | 0 | 0 | 1 | 0 | 0 | 0 | 0 | 1 | 1 | 1 |
| BIGGAN_256      | 1 | 0 | 0 | 0 | 0 | 1 | 0 | 0 | 0 | 0 | 1 | 0 | 0 | 0 | 0 | 1 | 1 | 1 |
| BIGGAN_512      | 1 | 0 | 0 | 0 | 0 | 1 | 0 | 0 | 0 | 0 | 1 | 0 | 0 | 0 | 0 | 1 | 1 | 1 |
| Blended_DM      | 0 | 0 | 0 | 1 | 0 | 0 | 0 | 0 | 1 | 0 | 0 | 0 | 0 | 1 | 0 | 1 | 1 | 1 |
| CADGAN          | 1 | 0 | 0 | 0 | 0 | 1 | 0 | 0 | 0 | 0 | 1 | 0 | 0 | 0 | 1 | 0 | 1 | 1 |
| CCGAN           | 1 | 0 | 0 | 0 | 0 | 1 | 0 | 0 | 0 | 0 | 1 | 0 | 0 | 0 | 0 | 1 | 1 | 1 |
| CGAN            | 1 | 0 | 0 | 0 | 0 | 1 | 0 | 0 | 0 | 0 | 0 | 1 | 0 | 0 | 1 | 0 | 0 | 0 |
| CLIPDM          | 0 | 0 | 0 | 1 | 0 | 0 | 0 | 0 | 0 | 0 | 0 | 0 | 0 | 0 | 0 | 1 | 1 | 1 |
| COCO_GAN        | 1 | 0 | 0 | 0 | 0 | 1 | 0 | 0 | 0 | 0 | 1 | 0 | 0 | 0 | 1 | 0 | 0 | 0 |
| COGAN           | 1 | 0 | 0 | 0 | 0 | 1 | 0 | 0 | 0 | 0 | 0 | 1 | 0 | 0 | 1 | 0 | 1 | 1 |
| COLOUR_GAN      | 1 | 0 | 0 | 0 | 0 | 1 | 0 | 0 | 0 | 0 | 1 | 0 | 0 | 0 | 1 | 0 | 1 | 1 |
| CONT_ENC        | 1 | 0 | 0 | 0 | 0 | 1 | 0 | 0 | 0 | 0 | 0 | 1 | 0 | 0 | 1 | 0 | 1 | 1 |
| CONTRAGAN       | 1 | 0 | 0 | 0 | 0 | 1 | 0 | 0 | 0 | 0 | 1 | 0 | 0 | 0 | 1 | 0 | 1 | 0 |
| CONTROLNET      | 0 | 0 | 0 | 1 | 0 | 0 | 0 | 0 | 1 | 0 | 0 | 0 | 0 | 1 | 0 | 1 | 1 | 0 |
| COUNCIL_GAN     | 0 | 1 | 0 | 0 | 0 | 1 | 0 | 0 | 0 | 0 | 1 | 0 | 0 | 0 | 1 | 0 | 1 | 0 |
| CRAMER_GAN      | 1 | 0 | 0 | 0 | 0 | 1 | 0 | 0 | 0 | 0 | 1 | 0 | 0 | 0 | 1 | 0 | 1 | 0 |
| CRGAN_C         | 1 | 0 | 0 | 0 | 0 | 1 | 0 | 0 | 0 | 0 | 1 | 0 | 0 | 0 | 1 | 0 | 1 | 0 |
| CRGAN_P         | 1 | 0 | 0 | 0 | 0 | 1 | 0 | 0 | 0 | 0 | 1 | 0 | 0 | 0 | 1 | 0 | 1 | 0 |
| CYCLEGAN        | 0 | 1 | 0 | 0 | 0 | 1 | 0 | 0 | 0 | 0 | 1 | 0 | 0 | 0 | 0 | 1 | 1 | 1 |
| DAGAN_C         | 1 | 0 | 0 | 0 | 0 | 1 | 0 | 0 | 0 | 0 | 1 | 0 | 0 | 0 | 1 | 0 | 1 | 0 |
| DAGAN_P         | 1 | 0 | 0 | 0 | 0 | 1 | 0 | 0 | 0 | 0 | 1 | 0 | 0 | 0 | 1 | 0 | 1 | 0 |
| DCGAN           | 1 | 0 | 0 | 0 | 0 | 1 | 0 | 0 | 0 | 0 | 1 | 0 | 0 | 0 | 1 | 0 | 1 | 0 |
| DDIFFGAN_32     | 0 | 0 | 0 | 1 | 0 | 0 | 0 | 0 | 1 | 0 | 0 | 0 | 0 | 1 | 0 | 1 | 1 | 1 |
| DDPM_32         | 0 | 0 | 0 | 1 | 0 | 0 | 0 | 0 | 0 | 0 | 0 | 0 | 0 | 0 | 0 | 1 | 1 | 1 |
| DDPM_256        | 0 | 0 | 0 | 1 | 0 | 0 | 0 | 0 | 0 | 0 | 0 | 0 | 0 | 0 | 0 | 1 | 1 | 1 |
| DEEPFOOL        | 0 | 0 | 1 | 0 | 1 | 0 | 0 | 0 | 0 | 0 | 1 | 0 | 0 | 0 | 0 | 1 | 0 | 0 |
| DFCVAE          | 1 | 0 | 0 | 0 | 0 | 0 | 0 | 1 | 0 | 0 | 0 | 1 | 0 | 0 | 1 | 0 | 0 | 1 |
| DIFF_ISGEN      | 1 | 0 | 0 | 0 | 0 | 0 | 0 | 1 | 0 | 0 | 0 | 0 | 1 | 0 | 0 | 1 | 1 | 0 |
| DIFF_PGAN       | 1 | 0 | 0 | 0 | 0 | 0 | 0 | 1 | 0 | 0 | 0 | 0 | 1 | 0 | 0 | 1 | 1 | 0 |
| DIFF_SGAN       | 1 | 0 | 0 | 0 | 0 | 0 | 0 | 1 | 0 | 0 | 0 | 0 | 1 | 0 | 0 | 1 | 1 | 0 |
| DIFFAE          | 0 | 0 | 0 | 1 | 0 | 0 | 0 | 0 | 1 | 0 | 0 | 0 | 0 | 1 | 0 | 1 | 1 | 1 |
| DIFFAE_LATENT   | 0 | 0 | 0 | 1 | 0 | 0 | 0 | 0 | 1 | 0 | 0 | 0 | 0 | 1 | 0 | 1 | 1 | 1 |
| DISCOGAN        | 0 | 1 | 0 | 0 | 0 | 1 | 0 | 0 | 0 | 0 | 0 | 1 | 0 | 0 | 0 | 1 | 1 | 1 |
| DRGAN           | 1 | 0 | 0 | 0 | 0 | 1 | 0 | 0 | 0 | 1 | 0 | 0 | 0 | 0 | 1 | 0 | 1 | 1 |
| DRIT            | 0 | 1 | 0 | 0 | 0 | 1 | 0 | 0 | 0 | 0 | 1 | 0 | 0 | 0 | 0 | 1 | 1 | 1 |
| DUALGAN         | 1 | 0 | 0 | 0 | 0 | 1 | 0 | 0 | 0 | 0 | 1 | 0 | 0 | 0 | 1 | 0 | 0 | 0 |
| EBGAN           | 1 | 0 | 0 | 0 | 0 | 1 | 0 | 0 | 0 | 0 | 0 | 1 | 0 | 0 | 1 | 0 | 0 | 1 |
| ESRGAN          | 0 | 0 | 1 | 0 | 0 | 0 | 1 | 0 | 0 | 0 | 0 | 1 | 0 | 0 | 0 | 1 | 0 | 0 |
| FACTOR_VAE      | 0 | 0 | 0 | 0 | 0 | 0 | 0 | 1 | 0 | 0 | 1 | 0 | 0 | 0 | 1 | 0 | 1 | 1 |
| FASTPIXEL       | 1 | 0 | 0 | 0 | 0 | 0 | 0 | 0 | 1 | 0 | 0 | 0 | 0 | 0 | 1 | 0 | 1 | 0 |
| FFGAN           | 1 | 0 | 0 | 0 | 0 | 1 | 0 | 0 | 0 | 0 | 1 | 0 | 0 | 0 | 0 | 1 | 1 | 1 |
| FGAN            | 1 | 0 | 0 | 0 | 0 | 0 | 0 | 1 | 0 | 0 | 1 | 0 | 0 | 0 | 1 | 0 | 1 | 0 |
| FGAN_KL         | 1 | 0 | 0 | 0 | 0 | 0 | 0 | 1 | 0 | 0 | 1 | 0 | 0 | 0 | 1 | 0 | 1 | 0 |
| FGAN_NEYMAN     | 1 | 0 | 0 | 0 | 0 | 0 | 0 | 1 | 0 | 0 | 1 | 0 | 0 | 0 | 1 | 0 | 1 | 0 |
| FGAN_PEARSON    | 1 | 0 | 0 | 0 | 0 | 0 | 0 | 1 | 0 | 0 | 1 | 0 | 0 | 0 | 1 | 0 | 1 | 0 |
| FGSM            | 0 | 0 | 1 | 0 | 1 | 0 | 0 | 0 | 0 | 0 | 1 | 0 | 0 | 0 | 0 | 1 | 0 | 0 |
| FPGAN           | 0 | 1 | 0 | 0 | 0 | 1 | 0 | 0 | 0 | 0 | 1 | 0 | 0 | 0 | 1 | 0 | 0 | 1 |
| FSGAN           | 1 | 0 | 0 | 0 | 1 | 0 | 0 | 0 | 0 | 0 | 1 | 0 | 0 | 0 | 0 | 1 | 1 | 1 |
| FVBN            | 0 | 0 | 1 | 0 | 0 | 0 | 0 | 1 | 0 | 1 | 0 | 0 | 0 | 0 | 1 | 0 | 1 | 0 |
| GAN_ANIME       | 0 | 1 | 0 | 0 | 0 | 1 | 0 | 0 | 0 | 0 | 1 | 0 | 0 | 0 | 1 | 0 | 1 | 1 |
| GATED_PIXEL_CNN | 0 | 0 | 1 | 0 | 0 | 0 | 0 | 1 | 0 | 0 | 0 | 1 | 0 | 0 | 0 | 1 | 1 | 0 |
| GDWCT           | 0 | 1 | 0 | 0 | 0 | 1 | 0 | 0 | 0 | 0 | 1 | 0 | 0 | 0 | 1 | 0 | 0 | 1 |
| GFLM            | 0 | 0 | 1 | 0 | 1 | 0 | 0 | 0 | 0 | 0 | 1 | 0 | 0 | 0 | 0 | 1 | 0 | 0 |
| GGAN            | 1 | 0 | 0 | 0 | 0 | 1 | 0 | 0 | 0 | 0 | 1 | 0 | 0 | 0 | 1 | 0 | 1 | 1 |
| GLIDE           | 0 | 0 | 0 | 1 | 0 | 0 | 0 | 0 | 1 | 0 | 0 | 0 | 0 | 1 | 0 | 1 | 1 | 1 |

Table 14: Ground truth feature vector used for prediction of Discrete Architecture Hyperparameters for all GMs. The discrete architecture hyperparameter ground truth is defined in (Tab. 5). **A — D** are Batch Norm., Instance Norm., Adaptive Instance Norm., and Group Norm., respectively. **E — I** are non-linearity in the last layer and they are ReLU, Tanh, Leaky\_ReLu, Sigmoid, and SiLU. **J — N** are non-linearity in the last block and they are ELU, ReLU, Leaky\_ReLu, Sigmoid, and SiLU. **O** and **P** are Nearest Neighbour and Deconvolution Upsampling. **Q** and **L** are Skip Connection and Downsampling.

| GM             | A | B | C | D | E | F | G | H | I | J | K | L | M | N | O | P | Q | L |
|----------------|---|---|---|---|---|---|---|---|---|---|---|---|---|---|---|---|---|---|
| ICRGAN_C       | 1 | 0 | 0 | 0 | 0 | 1 | 0 | 0 | 0 | 0 | 1 | 0 | 0 | 0 | 1 | 0 | 1 | 0 |
| ICRGAN_P       | 1 | 0 | 0 | 0 | 0 | 1 | 0 | 0 | 0 | 0 | 1 | 0 | 0 | 0 | 1 | 0 | 1 | 0 |
| IDDPN_32       | 0 | 0 | 0 | 1 | 0 | 0 | 0 | 0 | 1 | 0 | 0 | 0 | 0 | 1 | 0 | 1 | 1 | 1 |
| IDDPN_64       | 0 | 0 | 0 | 1 | 0 | 0 | 0 | 0 | 1 | 0 | 0 | 0 | 0 | 1 | 0 | 1 | 1 | 1 |
| IDDPN_256      | 0 | 0 | 0 | 1 | 0 | 0 | 0 | 0 | 1 | 0 | 0 | 0 | 0 | 1 | 0 | 1 | 1 | 1 |
| IMAGE_GPT      | 1 | 0 | 0 | 0 | 0 | 0 | 0 | 1 | 0 | 0 | 0 | 1 | 0 | 0 | 0 | 1 | 1 | 1 |
| INFOGAN        | 1 | 0 | 0 | 0 | 0 | 1 | 0 | 0 | 0 | 0 | 0 | 1 | 0 | 0 | 1 | 0 | 0 | 1 |
| ILVER_256      | 0 | 0 | 0 | 1 | 0 | 0 | 0 | 0 | 0 | 0 | 0 | 0 | 0 | 0 | 0 | 1 | 1 | 1 |
| LAPGAN         | 0 | 0 | 1 | 0 | 0 | 1 | 0 | 0 | 0 | 0 | 1 | 0 | 0 | 0 | 0 | 1 | 1 | 0 |
| LDM            | 0 | 0 | 0 | 1 | 0 | 0 | 0 | 0 | 1 | 0 | 0 | 0 | 0 | 1 | 0 | 1 | 1 | 1 |
| LDM_CON        | 0 | 0 | 0 | 1 | 0 | 0 | 0 | 0 | 1 | 0 | 0 | 0 | 0 | 1 | 0 | 1 | 1 | 1 |
| LMCONV         | 0 | 0 | 1 | 0 | 0 | 0 | 0 | 1 | 0 | 1 | 0 | 0 | 0 | 0 | 0 | 1 | 1 | 1 |
| LOGAN          | 1 | 0 | 0 | 0 | 0 | 1 | 0 | 0 | 0 | 0 | 1 | 0 | 0 | 0 | 1 | 0 | 1 | 0 |
| LSGAN          | 1 | 0 | 0 | 0 | 0 | 1 | 0 | 0 | 0 | 0 | 1 | 0 | 0 | 0 | 1 | 0 | 0 | 0 |
| MADE           | 0 | 0 | 1 | 0 | 0 | 0 | 0 | 1 | 0 | 1 | 0 | 0 | 0 | 0 | 1 | 0 | 1 | 0 |
| MAGAN          | 1 | 0 | 0 | 0 | 0 | 1 | 0 | 0 | 0 | 0 | 1 | 0 | 0 | 0 | 1 | 0 | 1 | 0 |
| MEMGAN         | 1 | 0 | 0 | 0 | 0 | 1 | 0 | 0 | 0 | 0 | 1 | 0 | 0 | 0 | 1 | 0 | 1 | 0 |
| MMD_GAN        | 1 | 0 | 0 | 0 | 0 | 1 | 0 | 0 | 0 | 0 | 1 | 0 | 0 | 0 | 1 | 0 | 1 | 0 |
| MRGAN          | 1 | 0 | 0 | 0 | 0 | 1 | 0 | 0 | 0 | 0 | 1 | 0 | 0 | 0 | 1 | 0 | 1 | 0 |
| MSG_STYLE_GAN  | 0 | 1 | 0 | 0 | 0 | 0 | 1 | 0 | 0 | 0 | 0 | 1 | 0 | 0 | 0 | 1 | 0 | 1 |
| MUNIT          | 0 | 1 | 0 | 0 | 1 | 0 | 0 | 0 | 0 | 0 | 1 | 0 | 0 | 0 | 0 | 1 | 1 | 1 |
| NADE           | 0 | 0 | 1 | 0 | 0 | 0 | 0 | 1 | 0 | 1 | 0 | 0 | 0 | 0 | 1 | 0 | 1 | 0 |
| OCFGAN         | 1 | 0 | 0 | 0 | 0 | 1 | 0 | 0 | 0 | 0 | 1 | 0 | 0 | 0 | 1 | 0 | 1 | 0 |
| PGD            | 0 | 0 | 1 | 0 | 1 | 0 | 0 | 0 | 0 | 0 | 1 | 0 | 0 | 0 | 0 | 1 | 0 | 0 |
| PIX2PIX        | 0 | 1 | 0 | 0 | 0 | 1 | 0 | 0 | 0 | 0 | 0 | 1 | 0 | 0 | 0 | 1 | 1 | 1 |
| PIXELCNN       | 1 | 0 | 0 | 0 | 0 | 0 | 0 | 1 | 0 | 1 | 0 | 0 | 0 | 0 | 1 | 0 | 1 | 0 |
| PIXELCNN_PP    | 0 | 0 | 1 | 0 | 0 | 0 | 0 | 1 | 0 | 1 | 0 | 0 | 0 | 0 | 0 | 1 | 1 | 1 |
| PIXELDA        | 1 | 0 | 0 | 0 | 0 | 1 | 0 | 0 | 0 | 0 | 1 | 0 | 0 | 0 | 0 | 1 | 0 | 0 |
| PIXELSNAIL     | 0 | 0 | 1 | 0 | 1 | 0 | 0 | 0 | 0 | 0 | 0 | 0 | 1 | 0 | 1 | 0 | 1 | 0 |
| PNDM_32        | 0 | 0 | 0 | 1 | 0 | 0 | 0 | 0 | 1 | 0 | 0 | 0 | 0 | 1 | 0 | 1 | 1 | 1 |
| PNDM_256       | 0 | 0 | 0 | 1 | 0 | 0 | 0 | 0 | 1 | 0 | 0 | 0 | 0 | 1 | 0 | 1 | 1 | 1 |
| PROG_GAN       | 1 | 0 | 0 | 0 | 0 | 0 | 0 | 1 | 0 | 0 | 0 | 0 | 1 | 0 | 1 | 0 | 0 | 1 |
| RGAN           | 1 | 0 | 0 | 0 | 0 | 1 | 0 | 0 | 0 | 0 | 1 | 0 | 0 | 0 | 1 | 0 | 0 | 1 |
| RSGAN_HALF     | 1 | 0 | 0 | 0 | 0 | 1 | 0 | 0 | 0 | 0 | 1 | 0 | 0 | 0 | 1 | 0 | 1 | 0 |
| RSGAN_QUAR     | 1 | 0 | 0 | 0 | 0 | 1 | 0 | 0 | 0 | 0 | 1 | 0 | 0 | 0 | 1 | 0 | 1 | 0 |
| RSGAN_REG      | 1 | 0 | 0 | 0 | 0 | 1 | 0 | 0 | 0 | 0 | 1 | 0 | 0 | 0 | 1 | 0 | 1 | 0 |
| RSGAN_RES_BOT  | 1 | 0 | 0 | 0 | 0 | 1 | 0 | 0 | 0 | 0 | 1 | 0 | 0 | 0 | 0 | 1 | 1 | 0 |
| RSGAN_RES_HALF | 1 | 0 | 0 | 0 | 0 | 1 | 0 | 0 | 0 | 0 | 1 | 0 | 0 | 0 | 0 | 1 | 1 | 0 |
| RSGAN_RES_QUAR | 1 | 0 | 0 | 0 | 0 | 1 | 0 | 0 | 0 | 0 | 1 | 0 | 0 | 0 | 0 | 1 | 1 | 0 |
| RSGAN_RES_REG  | 1 | 0 | 0 | 0 | 0 | 1 | 0 | 0 | 0 | 0 | 1 | 0 | 0 | 0 | 0 | 1 | 1 | 0 |
| SAGAN          | 1 | 0 | 0 | 0 | 0 | 1 | 0 | 0 | 0 | 0 | 0 | 1 | 0 | 0 | 1 | 0 | 0 | 0 |
| SCOREDIFF_256  | 0 | 0 | 0 | 1 | 0 | 0 | 0 | 0 | 0 | 0 | 0 | 0 | 0 | 0 | 0 | 1 | 1 | 1 |
| SDEDIT         | 0 | 0 | 0 | 1 | 0 | 0 | 0 | 0 | 0 | 0 | 0 | 0 | 0 | 0 | 0 | 1 | 1 | 1 |
| SEAN           | 0 | 0 | 0 | 0 | 0 | 1 | 0 | 0 | 0 | 0 | 1 | 0 | 0 | 0 | 1 | 0 | 1 | 0 |
| SEMANTIC       | 0 | 1 | 0 | 0 | 0 | 1 | 0 | 0 | 0 | 0 | 1 | 0 | 0 | 0 | 1 | 0 | 0 | 1 |
| SGAN           | 1 | 0 | 0 | 0 | 0 | 1 | 0 | 0 | 0 | 0 | 0 | 1 | 0 | 0 | 1 | 0 | 0 | 1 |
| SNGAN          | 1 | 0 | 0 | 0 | 0 | 1 | 0 | 0 | 0 | 0 | 1 | 0 | 0 | 0 | 1 | 0 | 1 | 0 |
| SOFT_GAN       | 1 | 0 | 0 | 0 | 0 | 1 | 0 | 0 | 0 | 0 | 0 | 1 | 0 | 0 | 1 | 0 | 0 | 0 |
| SRFLOW         | 0 | 0 | 1 | 0 | 0 | 0 | 1 | 0 | 0 | 1 | 0 | 0 | 0 | 0 | 0 | 1 | 0 | 0 |
| SRRNET         | 1 | 0 | 0 | 0 | 0 | 1 | 0 | 0 | 0 | 0 | 1 | 0 | 0 | 0 | 1 | 0 | 1 | 1 |
| STANDARD_VAE   | 0 | 0 | 0 | 0 | 0 | 0 | 0 | 1 | 0 | 0 | 1 | 0 | 0 | 0 | 1 | 0 | 1 | 1 |
| STA_DM_15      | 0 | 0 | 0 | 1 | 0 | 0 | 0 | 0 | 1 | 0 | 0 | 0 | 0 | 1 | 0 | 1 | 1 | 0 |
| STA_DM_21      | 0 | 0 | 0 | 1 | 0 | 0 | 0 | 0 | 1 | 0 | 0 | 0 | 0 | 1 | 0 | 1 | 1 | 0 |
| STA_DM_XL      | 0 | 0 | 0 | 1 | 0 | 0 | 0 | 0 | 1 | 0 | 0 | 0 | 0 | 1 | 0 | 1 | 1 | 0 |
| STARGAN        | 0 | 1 | 0 | 0 | 0 | 1 | 0 | 0 | 0 | 0 | 1 | 0 | 0 | 0 | 1 | 0 | 0 | 1 |
| STARGAN_2      | 0 | 1 | 0 | 0 | 0 | 1 | 0 | 0 | 0 | 0 | 0 | 1 | 0 | 0 | 1 | 0 | 0 | 1 |
| STGAN          | 1 | 0 | 0 | 0 | 0 | 1 | 0 | 0 | 0 | 0 | 0 | 1 | 0 | 0 | 0 | 1 | 1 | 1 |
| STYLEGAN       | 0 | 1 | 0 | 0 | 0 | 0 | 1 | 0 | 0 | 0 | 0 | 1 | 0 | 0 | 0 | 1 | 0 | 1 |
| STYLEGAN_2     | 0 | 1 | 0 | 0 | 0 | 0 | 1 | 0 | 0 | 0 | 0 | 1 | 0 | 0 | 0 | 1 | 0 | 1 |
| STYLEGAN_ADA   | 0 | 1 | 0 | 0 | 0 | 0 | 1 | 0 | 0 | 0 | 0 | 1 | 0 | 0 | 0 | 1 | 0 | 1 |
| SURVAE_M       | 0 | 0 | 1 | 0 | 1 | 0 | 0 | 0 | 0 | 1 | 0 | 0 | 0 | 0 | 1 | 0 | 0 | 0 |
| SURVAE_N       | 0 | 0 | 1 | 0 | 1 | 0 | 0 | 0 | 0 | 1 | 0 | 0 | 0 | 0 | 1 | 0 | 0 | 0 |
| TPGAN          | 1 | 0 | 0 | 0 | 0 | 0 | 0 | 1 | 0 | 0 | 0 | 0 | 1 | 0 | 1 | 0 | 1 | 1 |
| UGAN           | 1 | 0 | 0 | 0 | 0 | 0 | 0 | 1 | 0 | 0 | 1 | 0 | 0 | 0 | 1 | 0 | 1 | 0 |
| UNIT           | 0 | 1 | 0 | 0 | 0 | 1 | 0 | 0 | 0 | 0 | 1 | 0 | 0 | 0 | 0 | 1 | 1 | 1 |
| VAE_FIELD      | 0 | 0 | 1 | 0 | 0 | 0 | 0 | 1 | 0 | 1 | 0 | 0 | 0 | 0 | 1 | 0 | 0 | 0 |
| VAE_FLOW       | 0 | 0 | 1 | 0 | 0 | 0 | 0 | 1 | 0 | 1 | 0 | 0 | 0 | 0 | 1 | 0 | 0 | 0 |
| VAE_GAN        | 1 | 0 | 0 | 0 | 0 | 1 | 0 | 0 | 0 | 0 | 1 | 0 | 0 | 0 | 1 | 0 | 0 | 1 |
| VDVAE          | 0 | 0 | 1 | 0 | 1 | 0 | 0 | 0 | 0 | 0 | 1 | 0 | 0 | 0 | 0 | 1 | 1 | 1 |
| WGAN           | 1 | 0 | 0 | 0 | 0 | 1 | 0 | 0 | 0 | 0 | 1 | 0 | 0 | 0 | 1 | 0 | 0 | 0 |
| WGAN_DRA       | 1 | 0 | 0 | 0 | 0 | 1 | 0 | 0 | 0 | 0 | 1 | 0 | 0 | 0 | 1 | 0 | 1 | 0 |
| WGAN_WC        | 1 | 0 | 0 | 0 | 0 | 1 | 0 | 0 | 0 | 0 | 1 | 0 | 0 | 0 | 1 | 0 | 1 | 0 |
| WGANP          | 1 | 0 | 0 | 0 | 0 | 1 | 0 | 0 | 0 | 0 | 1 | 0 | 0 | 0 | 1 | 0 | 0 | 0 |
| YLG            | 1 | 0 | 0 | 0 | 0 | 1 | 0 | 0 | 0 | 0 | 1 | 0 | 0 | 0 | 0 | 1 | 1 | 1 |

Table 15: Ground truth feature vector used for prediction of Continuous Architecture Hyperparameters for all GMs. The discrete architecture hyperparameter ground truth is defined in (Tab. 6). F1: # layers, F2: # convolutional layers, F3: # fully connected layers, F4: # pooling layers, F5: # normalization layers, F6: #filters, F7: # blocks, F8:# layers per block, and F9: # parameters.

| GM              | Layer # | Conv. # | FC # | Pool # | Norm. # | Filter # | Block # | Block Layer # | Para. #       |
|-----------------|---------|---------|------|--------|---------|----------|---------|---------------|---------------|
| AAE             | 9       | 0       | 7    | 0      | 2       | 0        | 0       | 0             | 1, 593, 378   |
| ACGAN           | 18      | 10      | 1    | 0      | 7       | 2, 307   | 5       | 3             | 4, 276, 739   |
| ADAGAN_C        | 35      | 14      | 13   | 1      | 7       | 4, 131   | 9       | 3             | 9, 416, 196   |
| ADAGAN_P        | 35      | 14      | 13   | 1      | 7       | 4, 131   | 9       | 3             | 9, 416, 196   |
| ADM_G_128       | 223     | 90      | 37   | 8      | 88      | N/A      | 34      | 7             | 421, 529, 606 |
| ADM_G_256       | 266     | 107     | 45   | 11     | 103     | N/A      | 39      | 7             | 553, 838, 086 |
| ADV_FACES       | 45      | 23      | 1    | 1      | 20      | 2, 627   | 4       | 6             | 30, 000, 000  |
| ALAE            | 33      | 25      | 8    | 0      | 0       | 4, 094   | 3       | 8             | 50, 200, 000  |
| BEGAN           | 10      | 9       | 1    | 0      | 0       | 515      | 2       | 4             | 7, 278, 472   |
| BETA_B          | 7       | 4       | 3    | 0      | 0       | 99       | 1       | 3             | 469, 173      |
| BETA_H          | 7       | 4       | 3    | 0      | 0       | 99       | 1       | 3             | 469, 173      |
| BETA_TCVAE      | 7       | 4       | 3    | 0      | 0       | 99       | 1       | 3             | 469, 173      |
| BGAN            | 8       | 0       | 5    | 0      | 3       | 0        | 2       | 3             | 1, 757, 412   |
| BICYCLE_GAN     | 25      | 14      | 1    | 0      | 10      | 4, 483   | 2       | 10            | 23, 680, 256  |
| BIGGAN_128      | 63      | 21      | 1    | 0      | 41      | 6, 123   | 6       | 10            | 50, 400, 000  |
| BIGGAN_256      | 75      | 25      | 1    | 0      | 49      | 7, 215   | 6       | 12            | 55, 900, 000  |
| BIGGAN_512      | 87      | 29      | 1    | 0      | 57      | 8, 365   | 6       | 14            | 56, 200, 000  |
| Blended_DM      | 266     | 107     | 45   | 11     | 103     | N/A      | 39      | 7             | 553, 838, 086 |
| CADGAN          | 8       | 4       | 1    | 0      | 3       | 451      | 3       | 2             | 3, 812, 355   |
| CCGAN           | 22      | 12      | 0    | 0      | 10      | 3, 203   | 2       | 9             | 29, 257, 731  |
| CGAN            | 8       | 0       | 5    | 0      | 3       | 0        | 2       | 3             | 1, 757, 412   |
| COCO_GAN        | 19      | 9       | 1    | 0      | 9       | 2, 883   | 3       | 4             | 50, 000, 000  |
| COGAN           | 9       | 5       | 0    | 0      | 4       | 259      | 2       | 2             | 1, 126, 790   |
| COLOUR_GAN      | 19      | 10      | 0    | 0      | 9       | 2, 435   | 2       | 9             | 19, 422, 404  |
| CONT_ENC        | 19      | 11      | 0    | 0      | 8       | 5, 987   | 2       | 8             | 40, 401, 187  |
| CONTRAGAN       | 35      | 14      | 13   | 1      | 7       | 4, 131   | 9       | 3             | 9, 416, 196   |
| CONTROLNET      | 427     | 121     | 132  | 0      | 174     | N/A      | 56      | 7             | 39, 726, 979  |
| COUNCIL_GAN     | 62      | 30      | 3    | 0      | 29      | 6, 214   | 2       | 10            | 69, 616, 944  |
| CLIPDM          | 226     | 120     | 34   | 0      | 72      | N/A      | 38      | 3             | 113, 673, 219 |
| CRAMER_GAN      | 9       | 4       | 1    | 0      | 4       | 454      | 2       | 3             | 9, 681, 284   |
| CRGAN_C         | 35      | 14      | 13   | 1      | 7       | 4, 131   | 9       | 3             | 9, 416, 196   |
| CRGAN_P         | 35      | 14      | 13   | 1      | 7       | 4, 131   | 9       | 3             | 9, 416, 196   |
| CYCLEGAN        | 47      | 24      | 0    | 0      | 23      | 2, 947   | 4       | 9             | 11, 378, 179  |
| DAGAN_C         | 35      | 14      | 13   | 1      | 7       | 4, 131   | 9       | 3             | 9, 416, 196   |
| DAGAN_P         | 35      | 14      | 13   | 1      | 7       | 4, 131   | 9       | 3             | 9, 416, 196   |
| DCGAN           | 9       | 4       | 1    | 0      | 4       | 454      | 2       | 3             | 9, 681, 284   |
| DDiFFGAN_32     | 289     | 80      | 91   | 0      | 118     | N/A      | 40      | 2             | 48, 432, 515  |
| DDPM_32         | 164     | 89      | 24   | 0      | 51      | N/A      | 28      | 7             | 35, 746, 307  |
| DDPM_256        | 225     | 120     | 34   | 0      | 71      | N/A      | 39      | 7             | 113, 673, 219 |
| DEEPFOOL        | 95      | 92      | 1    | 2      | 0       | 7, 236   | 4       | 10            | 22, 000, 000  |
| DFCVAE          | 45      | 22      | 2    | 0      | 21      | 4, 227   | 4       | 7             | 2, 546, 234   |
| DIFF_ISGEN      | 88      | 24      | 56   | 0      | 8       | N/A      | 8       | 6             | 30, 276, 583  |
| DIFF_PGAN       | 45      | 20      | 0    | 3      | 13      | N/A      | 11      | 4             | 105, 684, 175 |
| DIFF_SGAN       | 48      | 20      | 28   | 0      | 8       | N/A      | 8       | 6             | 24, 767, 458  |
| DIFFAE          | 712     | 263     | 171  | 45     | 233     | N/A      | 118     | 7             | 336, 984, 582 |
| DIFFAE_LATENT   | 717     | 264     | 172  | 46     | 235     | N/A      | 155     | 6             | 445, 203, 974 |
| DISCOGAN        | 21      | 12      | 0    | 0      | 9       | 3, 459   | 2       | 9             | 29, 241, 731  |
| DRGAN           | 44      | 28      | 1    | 1      | 14      | 4, 481   | 3       | 8             | 18, 885, 068  |
| DRIT            | 19      | 10      | 0    | 0      | 9       | 1, 793   | 4       | 3             | 9, 564, 170   |
| DUALGAN         | 25      | 14      | 1    | 0      | 10      | 4, 483   | 2       | 10            | 23, 680, 256  |
| EBGAN           | 6       | 3       | 1    | 0      | 2       | 195      | 2       | 2             | 738, 433      |
| ESRGAN          | 66      | 66      | 0    | 0      | 0       | 4, 547   | 5       | 4             | 7, 012, 163   |
| FACTOR_VAE      | 7       | 4       | 3    | 0      | 0       | 99       | 1       | 3             | 469, 173      |
| Fast pixel      | 17      | 9       | 0    | 0      | 8       | 768      | 2       | 8             | 4, 600, 000   |
| FFGAN           | 39      | 19      | 1    | 1      | 19      | 3, 261   | 0       | 0             | 50, 000, 000  |
| FGAN            | 5       | 0       | 3    | 0      | 2       | 0        | 2       | 2             | 2, 256, 401   |
| FGAN_KL         | 5       | 0       | 3    | 0      | 2       | 0        | 2       | 2             | 2, 256, 401   |
| FGAN_NEYMAN     | 5       | 0       | 3    | 0      | 2       | 0        | 2       | 2             | 2, 256, 401   |
| FGAN_PEARSON    | 5       | 0       | 3    | 0      | 2       | 0        | 2       | 2             | 2, 256, 401   |
| FGSM            | 95      | 92      | 1    | 2      | 0       | 7, 236   | 4       | 10            | 22, 000, 000  |
| FPGAN           | 23      | 12      | 0    | 0      | 11      | 2, 179   | 2       | 6             | 53, 192, 576  |
| FSGAN           | 37      | 20      | 0    | 1      | 16      | 2, 863   | 4       | 8             | 94, 669, 184  |
| FVBN            | 28      | 0       | 28   | 0      | 0       | 0        | 1       | 1             | 307, 721      |
| GAN_ANIME       | 25      | 18      | 0    | 0      | 7       | 2, 179   | 4       | 6             | 8, 467, 854   |
| Gated_pixel_cnn | 32      | 32      | 0    | 0      | 0       | 5, 433   | 3       | 10            | 3, 364, 161   |
| GDWCT           | 79      | 27      | 40   | 1      | 11      | 5, 699   | 2       | 4             | 51, 965, 832  |
| GFLM            | 95      | 92      | 1    | 2      | 0       | 7, 236   | 4       | 10            | 22, 000, 000  |
| GGAN            | 8       | 4       | 1    | 0      | 3       | 451      | 3       | 2             | 3, 812, 355   |
| GLIDE           | 331     | 93      | 103  | 6      | 129     | N/A      | 74      | 5             | 385, 030, 726 |
| ICRGAN_C        | 35      | 14      | 13   | 1      | 7       | 4, 131   | 9       | 3             | 9, 416, 196   |
| ICRGAN_P        | 35      | 14      | 13   | 1      | 7       | 4, 131   | 9       | 3             | 9, 416, 196   |

Table 16: Ground truth feature vector used for prediction of Continuous Architecture Hyperparameters for all GMs. The discrete architecture hyperparameter ground truth is defined in (Tab. 6). F1: # layers, F2: # convolutional layers, F3: # fully connected layers, F4: # pooling layers, F5: # normalization layers, F6: #filters, F7: # blocks, F8:# layers per block, and F9: # parameters.

| GM                | Layer # | Conv. # | FC # | Pool # | Norm. # | Filter # | Block # | Block Layer # | Para. #     |
|-------------------|---------|---------|------|--------|---------|----------|---------|---------------|-------------|
| IDDPM_32          | 193     | 85      | 32   | 0      | 76      | N/A      | 45      | 2             | 52,546,438  |
| IDDPM_64          | 195     | 87      | 32   | 0      | 76      | N/A      | 45      | 2             | 27,3049,350 |
| IDDPM_256         | 201     | 96      | 34   | 0      | 71      | N/A      | 40      | 5             | 113,676,678 |
| ILVER_256         | 266     | 107     | 45   | 11     | 103     | N/A      | 39      | 7             | 553,838,086 |
| Image_GPT         | 59      | 42      | 0    | 0      | 17      | 4,673    | 7       | 8             | 401,489     |
| INFOGAN           | 7       | 3       | 1    | 0      | 3       | 195      | 2       | 2             | 1,049,985   |
| LAPGAN            | 11      | 6       | 5    | 0      | 0       | 262      | 4       | 2             | 2,182,857   |
| LDM               | 255     | 127     | 24   | 0      | 104     | N/A      | 65      | 4             | 329,378,945 |
| LDM_CON           | 503     | 159     | 184  | 8      | 152     | N/A      | 65      | 8             | 456,755,873 |
| Lmconv            | 105     | 60      | 10   | 35     | 0       | 7,156    | 15      | 5             | 46,000,000  |
| LOGAN             | 35      | 14      | 13   | 1      | 7       | 4,131    | 9       | 3             | 9,416,196   |
| LSGAN             | 9       | 5       | 0    | 0      | 4       | 1,923    | 2       | 4             | 23,909,265  |
| MADE              | 2       | 0       | 2    | 0      | 0       | 0        | 1       | 2             | 12552784    |
| MAGAN             | 9       | 5       | 0    | 0      | 4       | 963      | 2       | 3             | 11,140,934  |
| MEMGAN            | 14      | 7       | 1    | 0      | 6       | 1,155    | 3       | 4             | 4,128,515   |
| MMD_GAN           | 9       | 4       | 1    | 0      | 4       | 454      | 2       | 3             | 9,681,284   |
| MRGAN             | 9       | 4       | 1    | 0      | 4       | 451      | 3       | 2             | 15,038,350  |
| MSG_STYLE_GAN     | 33      | 25      | 8    | 0      | 0       | 4,094    | 3       | 8             | 50,200,000  |
| MUNIT             | 18      | 15      | 0    | 0      | 3       | 3,715    | 2       | 6             | 10,305,035  |
| NADE              | 1       | 0       | 1    | 0      | 0       | 0        | 1       | 1             | 785,284     |
| OCFGAN            | 9       | 4       | 1    | 0      | 4       | 454      | 2       | 3             | 9,681,284   |
| PGD               | 95      | 92      | 1    | 2      | 0       | 7,236    | 4       | 10            | 22,000,000  |
| PIX2PIX           | 29      | 16      | 0    | 0      | 13      | 5,507    | 2       | 13            | 54,404,099  |
| PixelCNN          | 17      | 9       | 0    | 0      | 8       | 768      | 2       | 8             | 4,600,000   |
| PixelCNN++        | 105     | 60      | 10   | 35     | 0       | 7,156    | 15      | 5             | 46,000,000  |
| PIXELDA           | 27      | 14      | 1    | 0      | 12      | 835      | 4       | 6             | 483,715     |
| PixelSnail        | 90      | 90      | 0    | 0      | 0       | 4,051    | 3       | 10            | 40,000,000  |
| PNDM_32           | 164     | 89      | 24   | 0      | 51      | N/A      | 28      | 7             | 35,746,307  |
| PNDM_256          | 266     | 107     | 45   | 11     | 103     | N/A      | 39      | 7             | 553,838,086 |
| PROG_GAN          | 26      | 25      | 1    | 0      | 0       | 4,600    | 3       | 8             | 46,200,000  |
| RGAN              | 7       | 3       | 1    | 0      | 3       | 195      | 2       | 2             | 1,049,985   |
| RSGAN_HALF        | 8       | 4       | 1    | 0      | 3       | 899      | 3       | 2             | 13,129,731  |
| RSGAN_QUAR        | 8       | 4       | 1    | 0      | 3       | 451      | 3       | 2             | 3,812,355   |
| RSGAN_REG         | 8       | 4       | 1    | 0      | 3       | 1,795    | 3       | 2             | 48,279,555  |
| RSGAN_RES_BOT     | 15      | 7       | 1    | 0      | 7       | 963      | 3       | 4             | 758,467     |
| RSGAN_RES_HALF    | 15      | 7       | 1    | 0      | 7       | 1,155    | 3       | 4             | 1,201,411   |
| RSGAN_RES_QUAR    | 15      | 7       | 1    | 0      | 7       | 579      | 3       | 4             | 367,235     |
| RSGAN_RES_REG     | 15      | 7       | 1    | 0      | 7       | 2,307    | 3       | 4             | 4,270,595   |
| SAGAN             | 11      | 6       | 1    | 0      | 4       | 139      | 2       | 4             | 16,665,286  |
| SEAN              | 19      | 16      | 0    | 0      | 0       | 5,062    | 2       | 7             | 266,907,367 |
| SEMANTIC          | 23      | 12      | 0    | 0      | 11      | 2,179    | 2       | 6             | 53,192,576  |
| SGAN              | 7       | 3       | 1    | 0      | 3       | 195      | 2       | 2             | 1,049,985   |
| SCOREDIFF_256 225 | 120     | 34      | 0    | 11     | 71      | N/A      | 39      | 7             | 113,673,219 |
| SDEdit            | 226     | 120     | 34   | 0      | 72      | N/A      | 38      | 3             | 113,673,219 |
| SNGAN             | 23      | 11      | 1    | 0      | 11      | 3,871    | 4       | 5             | 10,000,000  |
| SOFT_GAN          | 8       | 0       | 5    | 0      | 3       | 0        | 2       | 3             | 1,757,412   |
| SRFLOW            | 66      | 66      | 0    | 0      | 2       | 4,547    | 5       | 4             | 7,012,163   |
| SRRNET            | 74      | 36      | 1    | 0      | 37      | 2,819    | 4       | 16            | 4,069,955   |
| STANDARD_VAE      | 7       | 4       | 3    | 0      | 0       | 99       | 1       | 3             | 469,173     |
| STARGAN           | 23      | 12      | 0    | 0      | 11      | 2,179    | 2       | 6             | 53,192,576  |
| STARGAN_2         | 67      | 26      | 12   | 4      | 25      | 4,188    | 4       | 12            | 94,008,488  |
| STA_DM_15         | 503     | 159     | 184  | 8      | 152     | N/A      | 65      | 8             | 456,755,873 |
| STA_DM_21         | 503     | 159     | 184  | 8      | 152     | N/A      | 65      | 8             | 456,755,873 |
| STA_DM_XL         | 601     | 184     | 201  | 12     | 185     | N/A      | 74      | 9             | 618,997,638 |
| STGAN             | 19      | 10      | 0    | 0      | 9       | 2,953    | 2       | 5             | 25,000,000  |
| STYLEGAN          | 33      | 25      | 8    | 0      | 0       | 4,094    | 3       | 8             | 50,200,000  |
| STYLEGAN_2        | 33      | 25      | 8    | 0      | 0       | 4,094    | 3       | 8             | 59,000,000  |
| STYLEGAN2_ADA     | 33      | 25      | 8    | 0      | 0       | 4,094    | 3       | 8             | 59,000,000  |
| SURVAE_FLOW_MAX   | 95      | 90      | 0    | 5      | 0       | 6,542    | 2       | 20            | 25,000,000  |
| SURVAE_FLOW_NON   | 90      | 90      | 0    | 0      | 0       | 6,542    | 2       | 20            | 25,000,000  |
| TPGAN             | 45      | 31      | 2    | 1      | 11      | 5,275    | 0       | 0             | 27,233,200  |
| UGAN              | 9       | 4       | 1    | 0      | 4       | 771      | 2       | 3             | 4,850,692   |
| UNIT              | 43      | 22      | 0    | 0      | 21      | 4,739    | 4       | 8             | 13,131,779  |
| VAE_field         | 6       | 0       | 6    | 0      | 0       | 0        | 1       | 3             | 300,304     |
| VAE_flow          | 14      | 0       | 14   | 0      | 0       | 0        | 2       | 4             | 760,448     |
| VAEGAN            | 17      | 7       | 2    | 0      | 8       | 867      | 2       | 6             | 26,396,740  |
| VDVAE             | 48      | 42      | 0    | 6      | 0       | 3,502    | 3       | 13            | 41,000,000  |
| WGAN              | 9       | 5       | 0    | 0      | 4       | 1,923    | 2       | 4             | 23,909,265  |
| WGAN_DRA          | 18      | 10      | 1    | 0      | 7       | 2,307    | 5       | 3             | 4,276,739   |
| WGAN_WC           | 18      | 10      | 1    | 0      | 7       | 2,307    | 5       | 3             | 4,276,739   |
| WGANP             | 9       | 5       | 0    | 0      | 4       | 1,923    | 2       | 4             | 23,905,841  |
| YLG               | 33      | 20      | 1    | 2      | 10      | 5,155    | 5       | 5             | 42,078,852  |
